# Supplementary material for: Senescent cells suppress macrophage-mediated corpse removal via upregulation of the CD47-QPCT/L axis
Source: PubMed Central journal article supplement (PMC9723804; doi:10.1083/jcb.202207097), 2022-12-02

# Source Data F7C

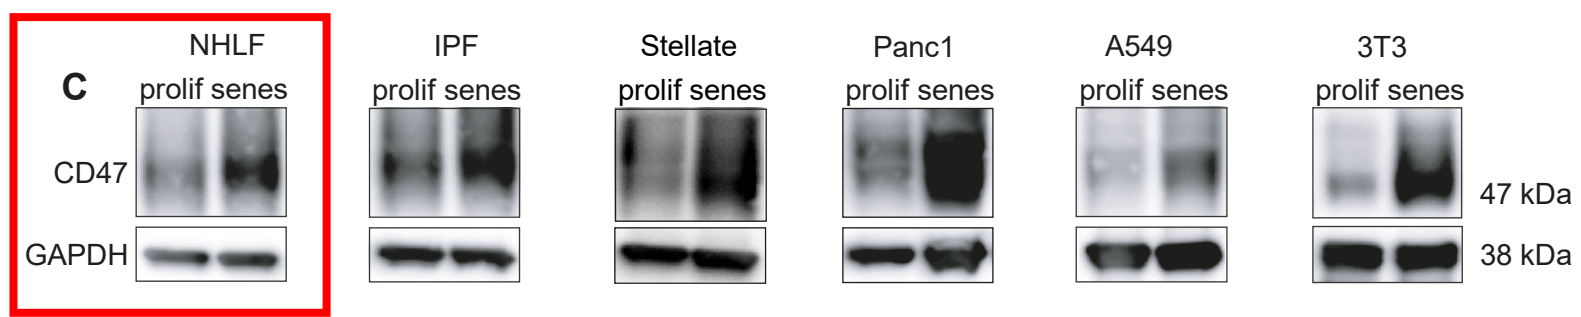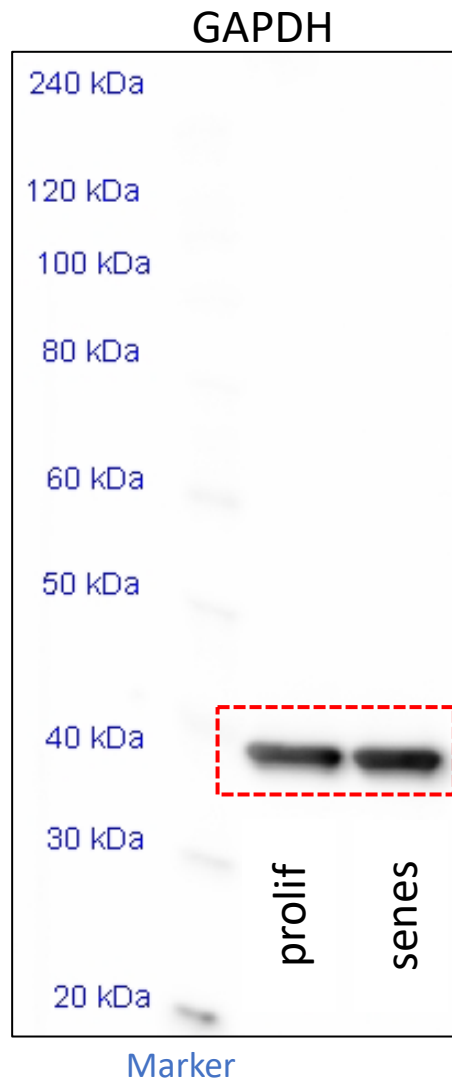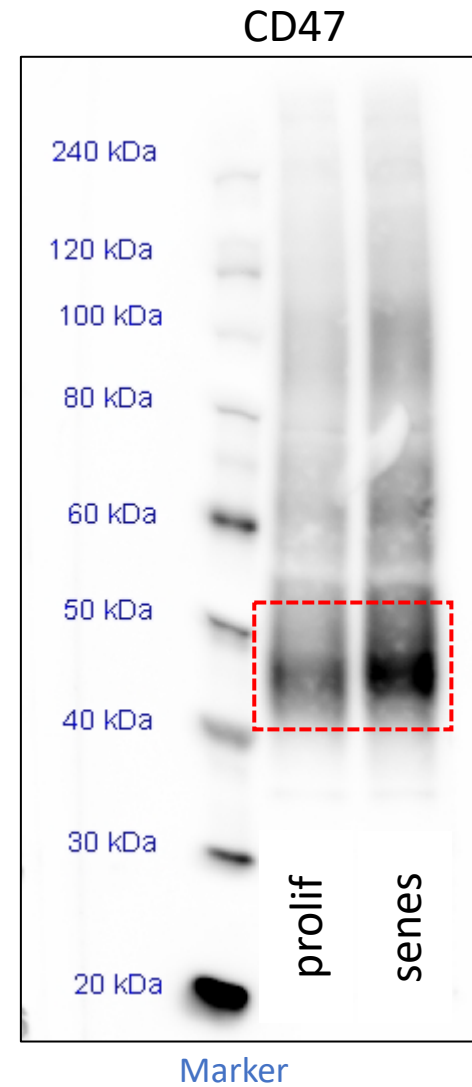

# Source Data F7C

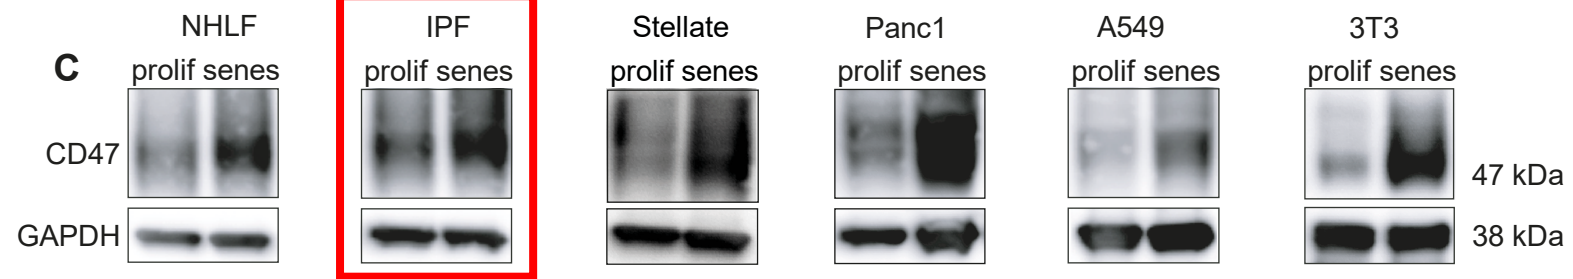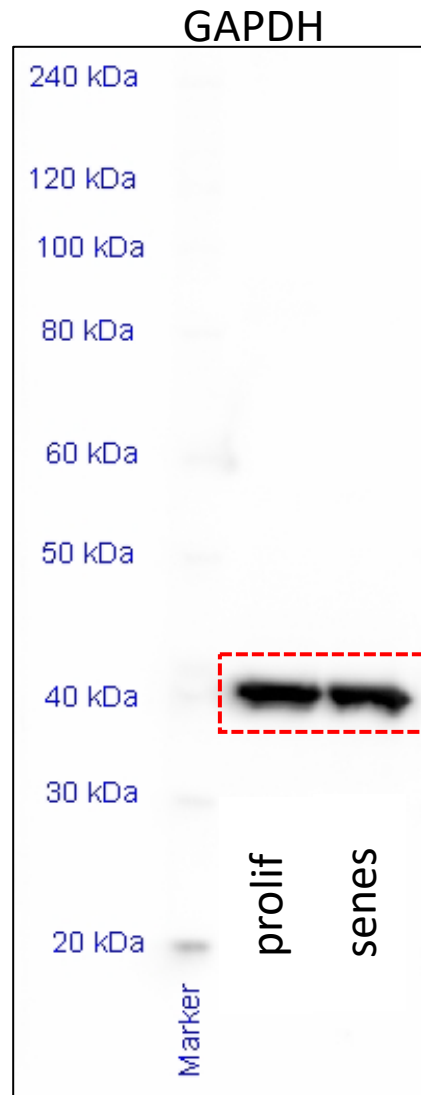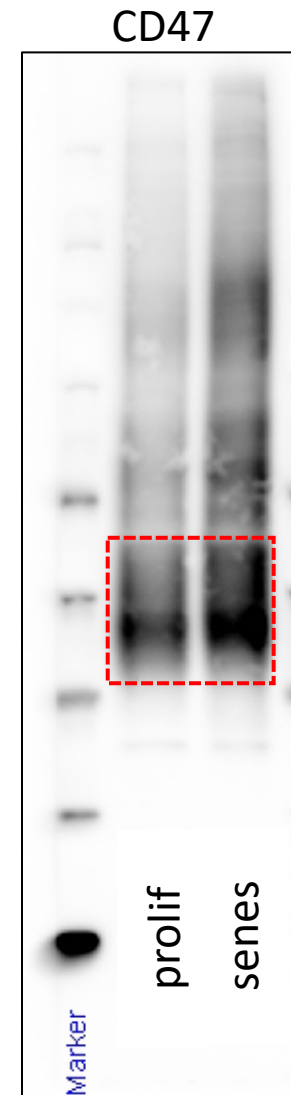

# Source Data F7C

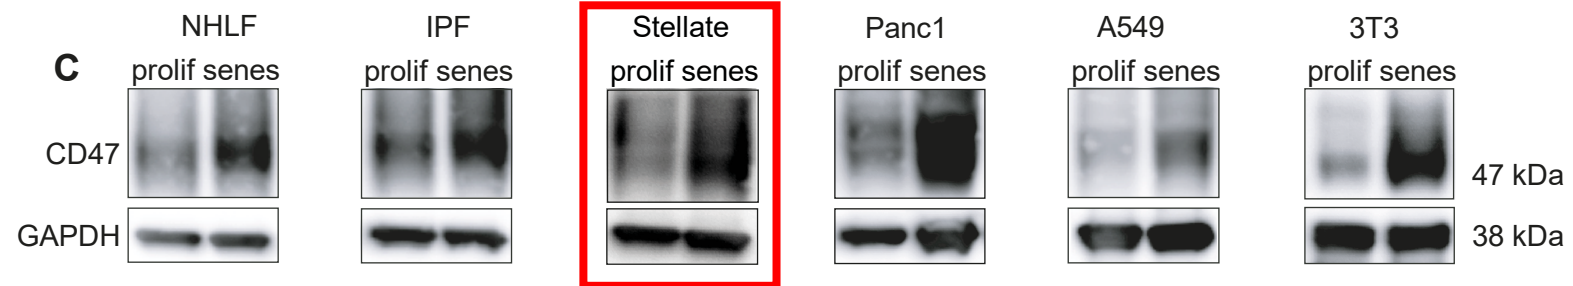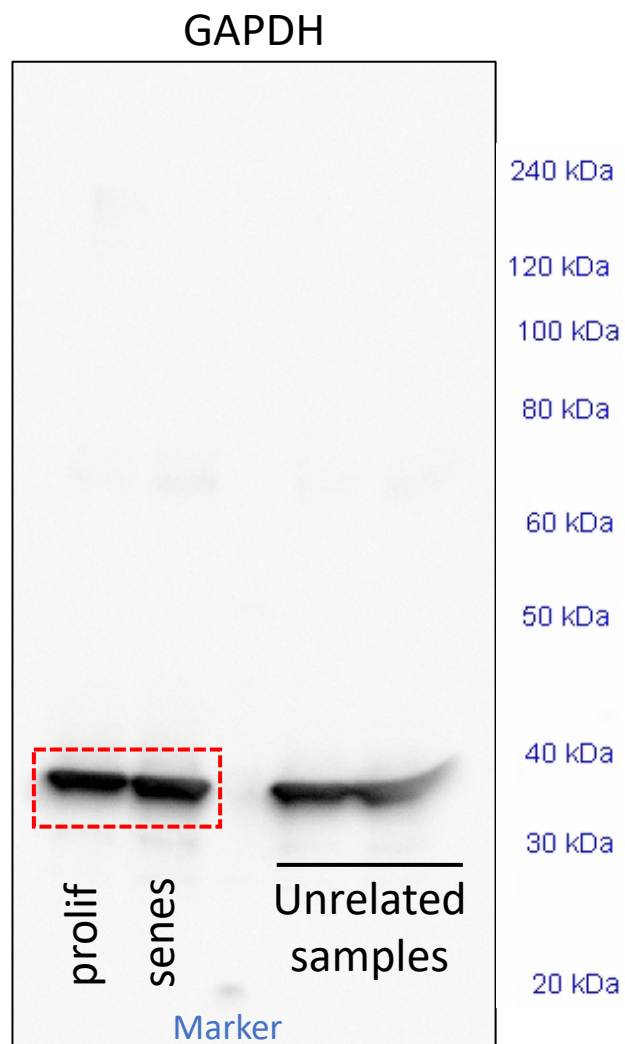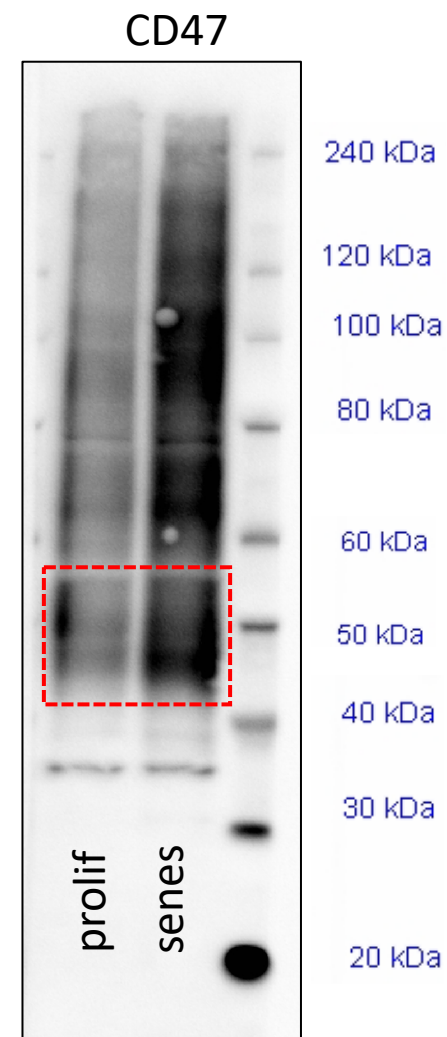

# Source Data F7C

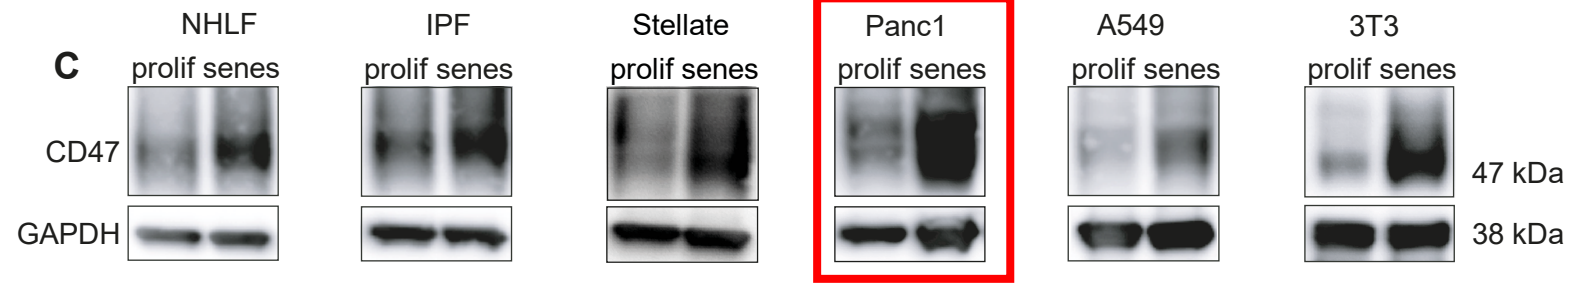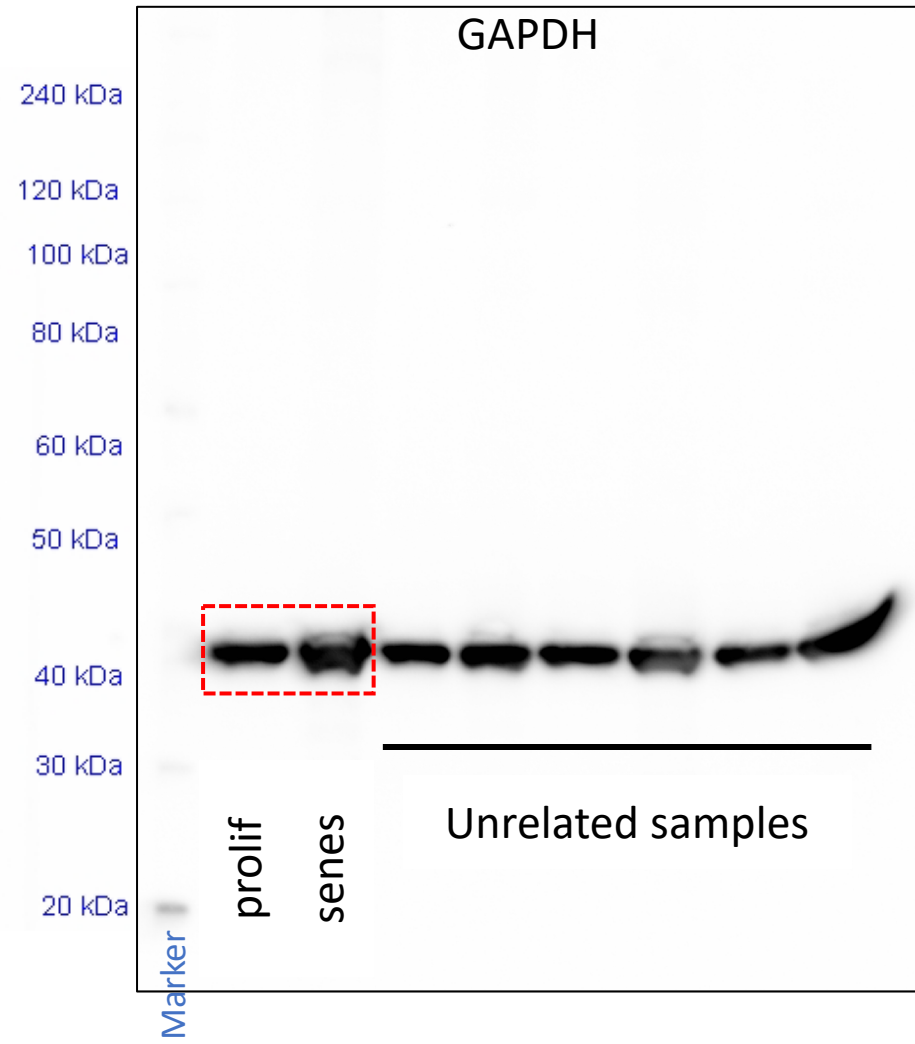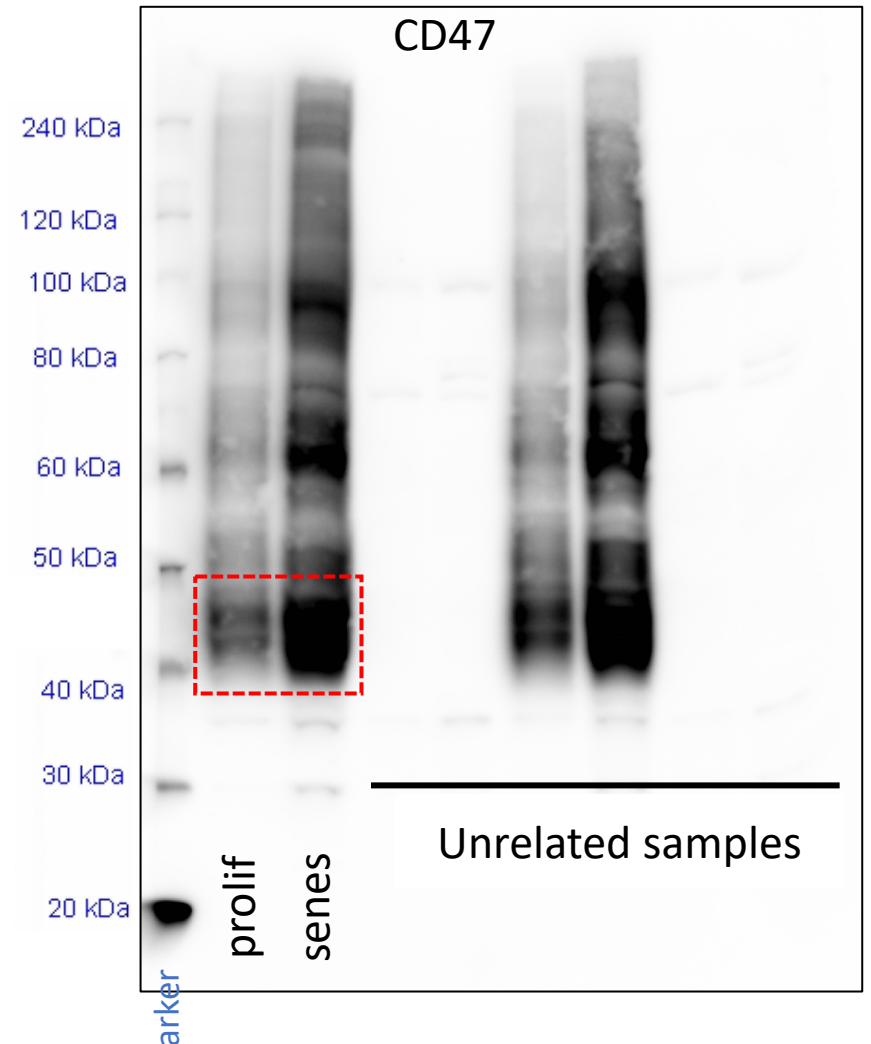



# Source Data F7C

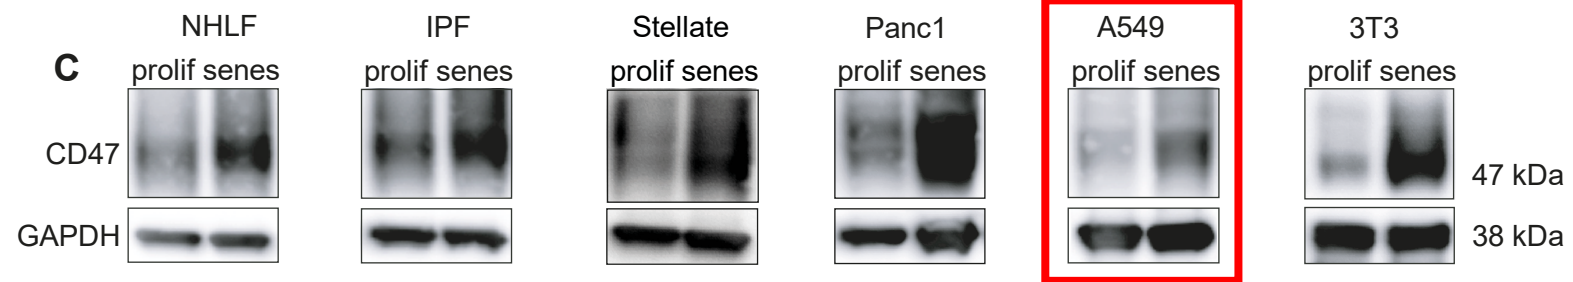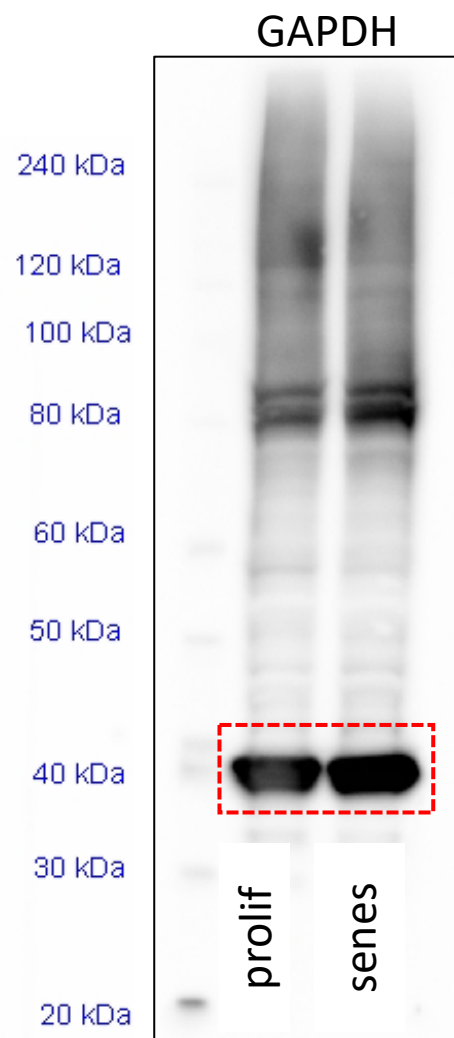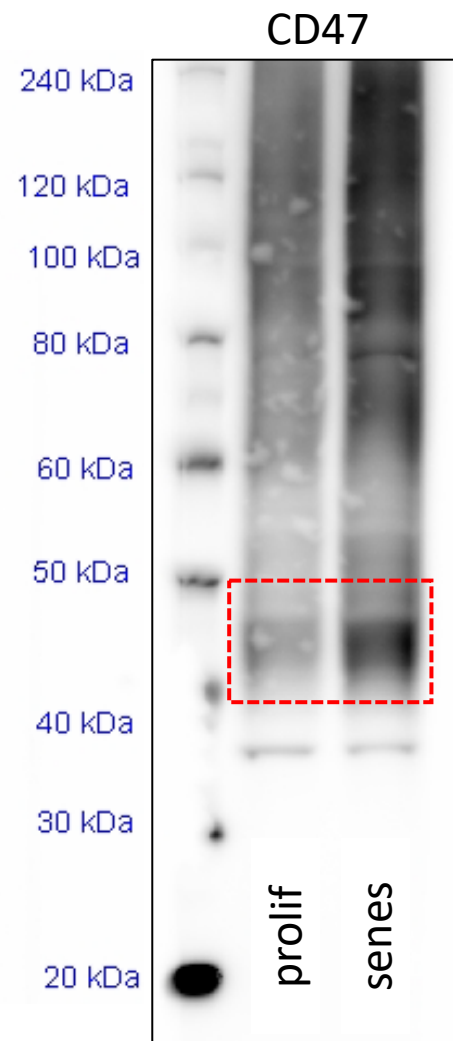

# Source Data F7C

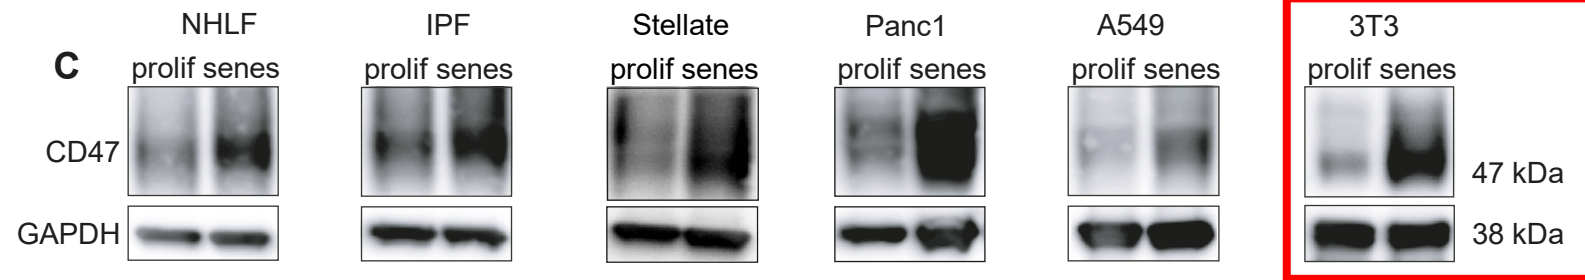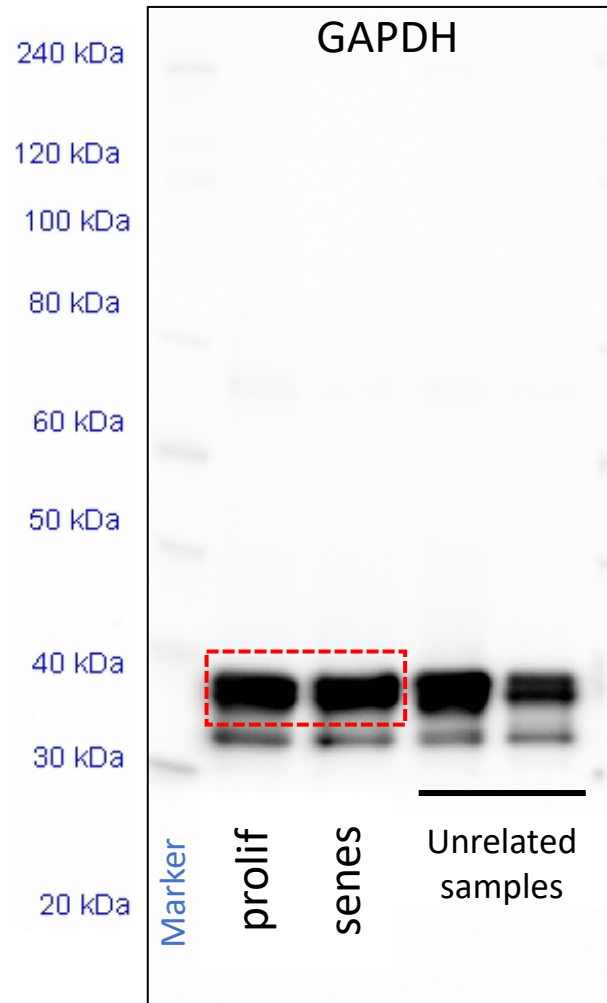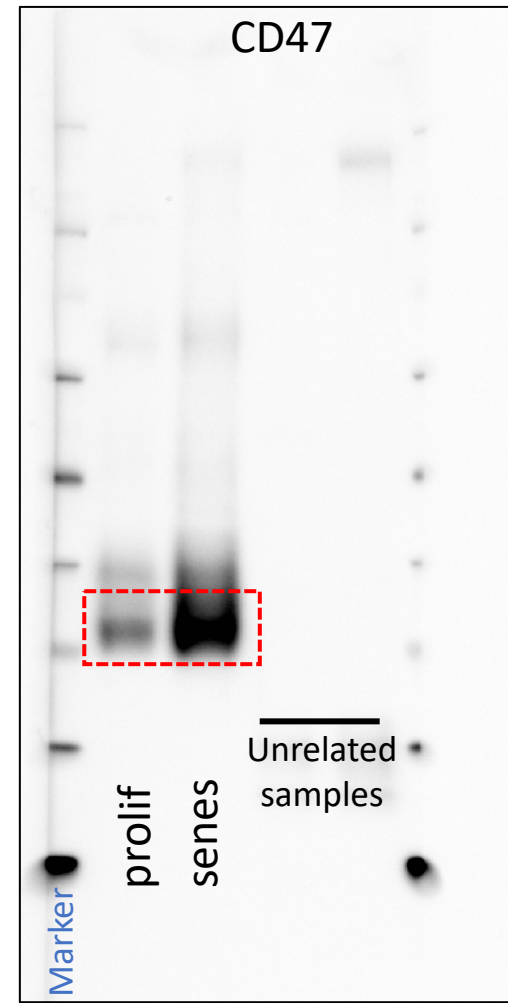

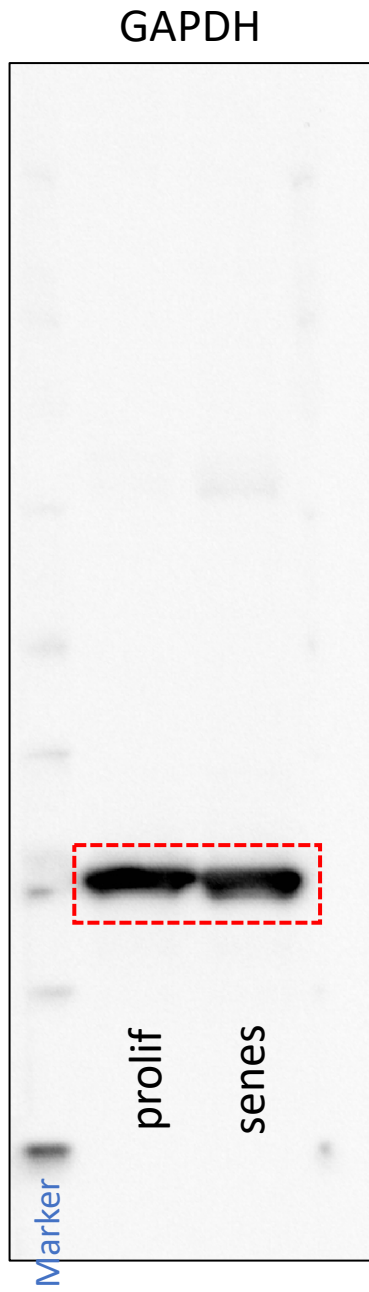

E

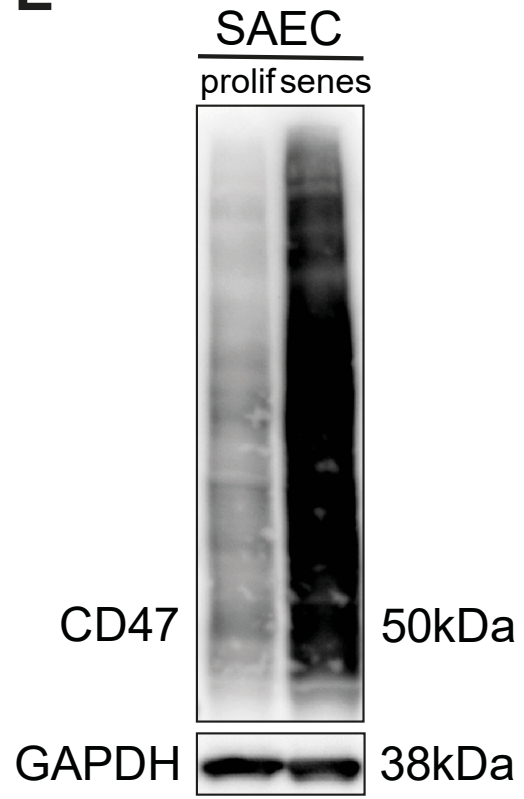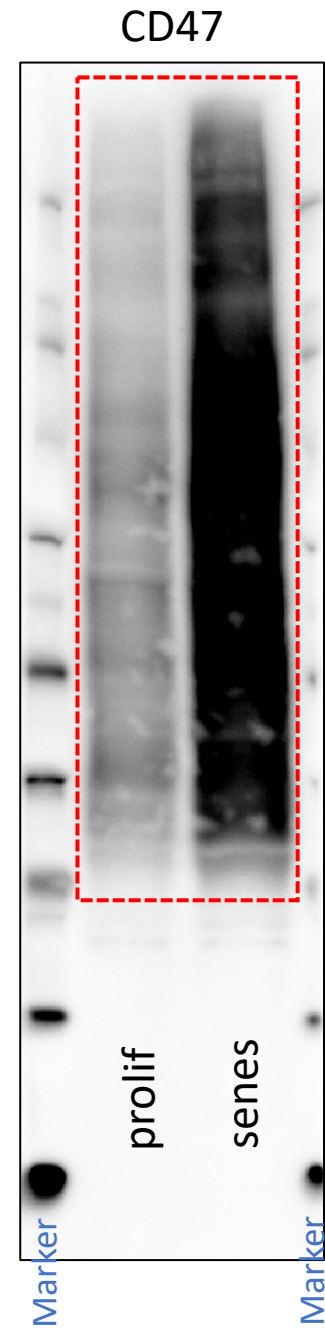

# Source Data F7G

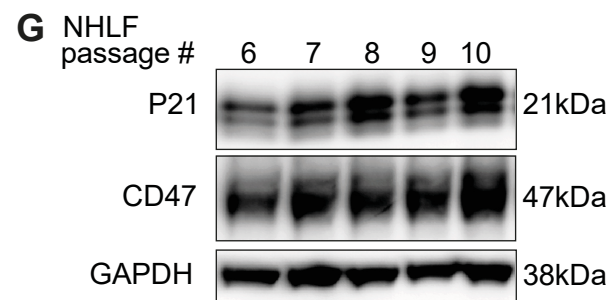

Membrane cutted at ~25kDa:  
upper part → GAPDH

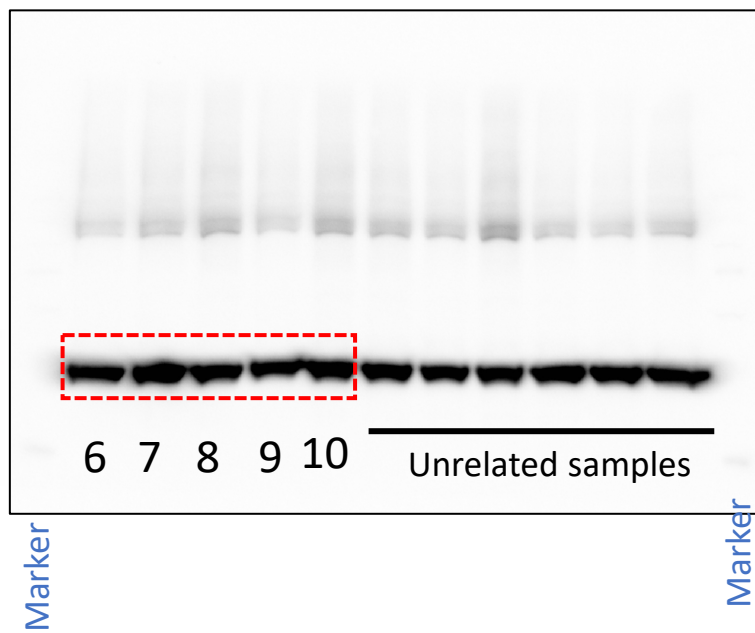

Lower part → P21

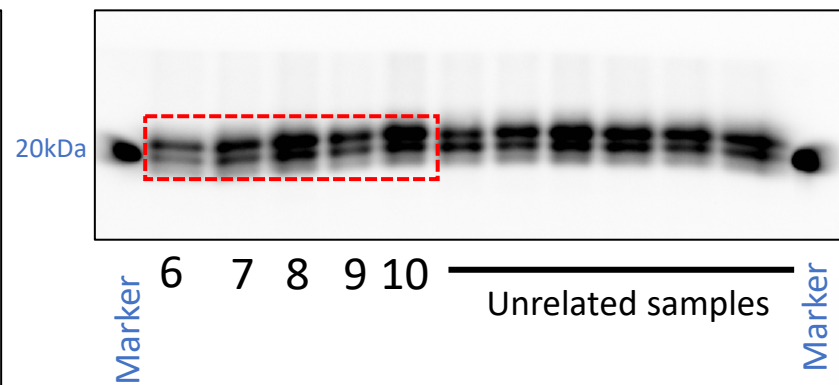

CD47

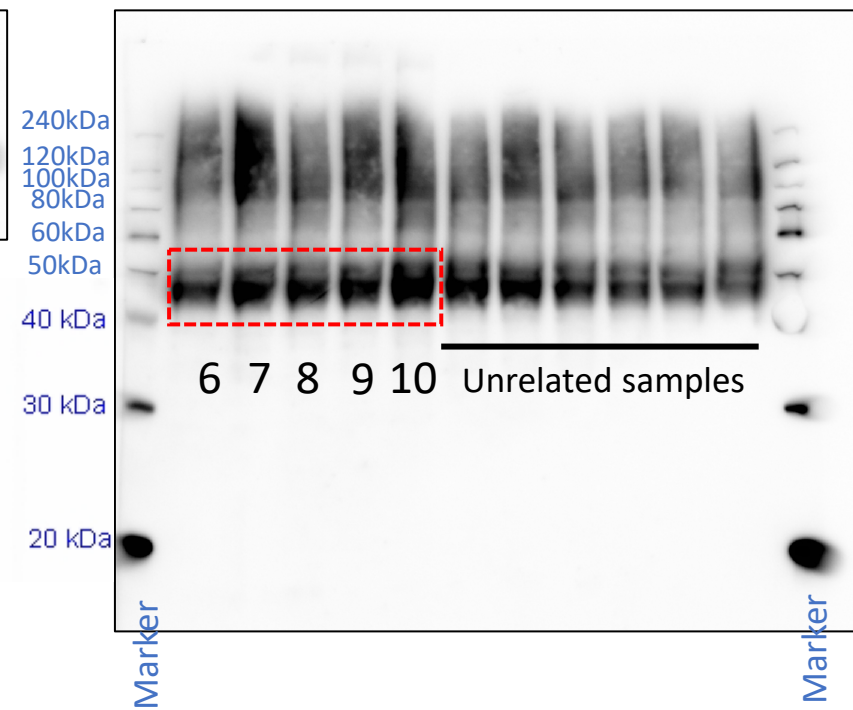

# Source Data F7G

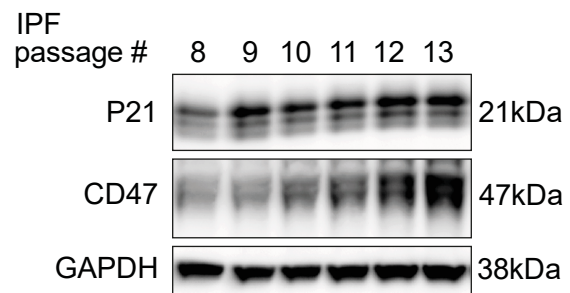

Membrane cutted at ~25kDa:  
upper part → **GAPDH**

Lower part → **P21**

**CD47**

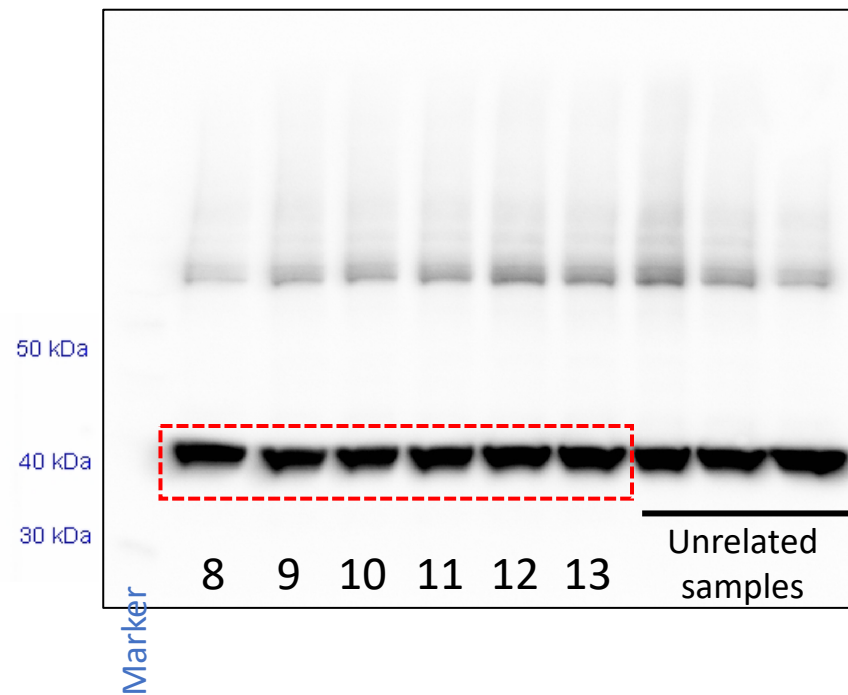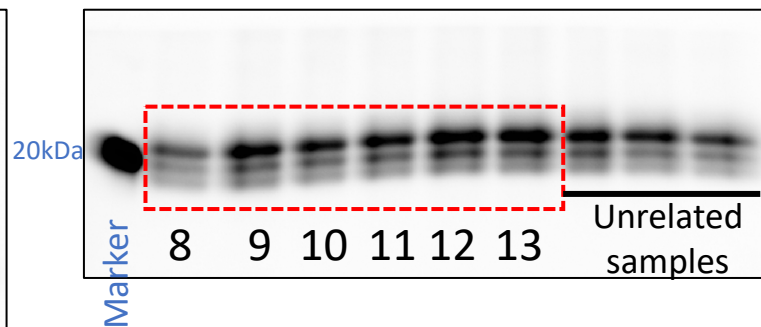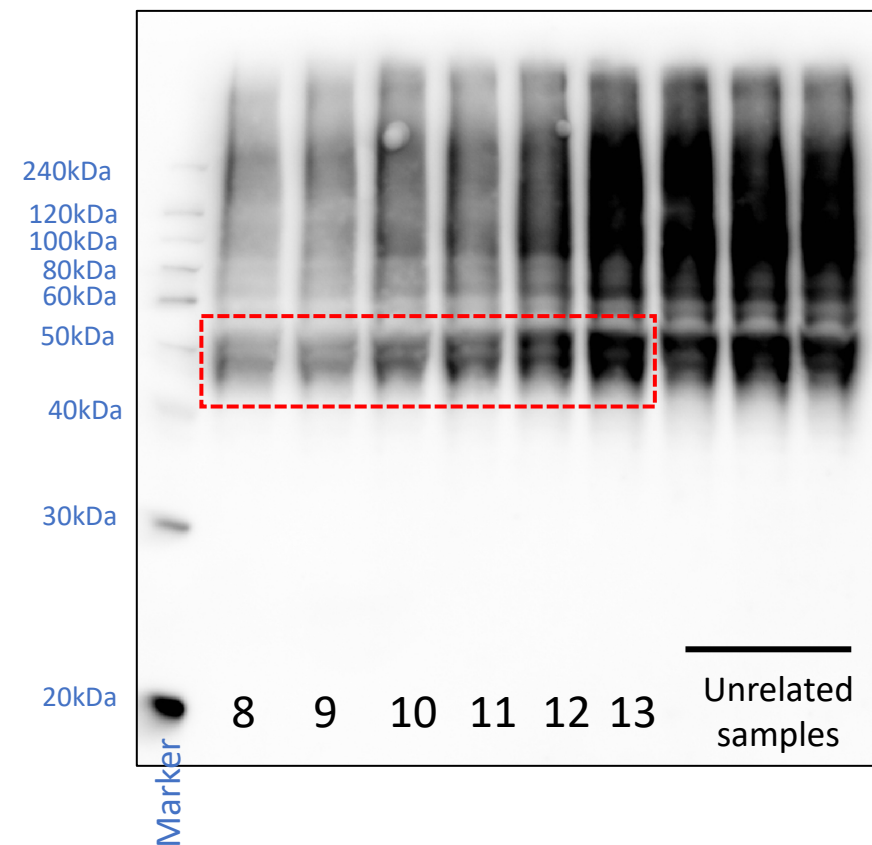

Supplement: JCB_202207097_SourceDataF7.pdf [file JCB_202207097_SourceDataF7.pdf]
