# Supplementary material for: Senescent cells suppress macrophage-mediated corpse removal via upregulation of the CD47-QPCT/L axis
Source: PubMed Central journal article supplement (PMC9723804; doi:10.1083/jcb.202207097), 2022-12-02

# Source Data F7E

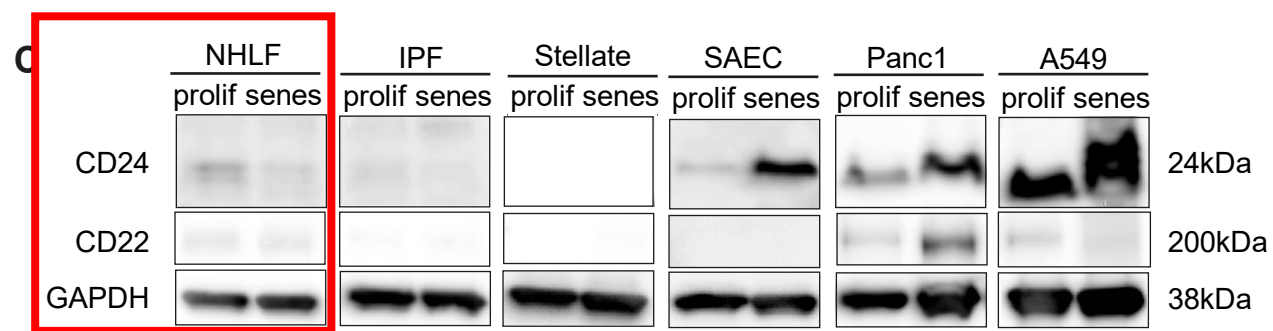

## GAPDH

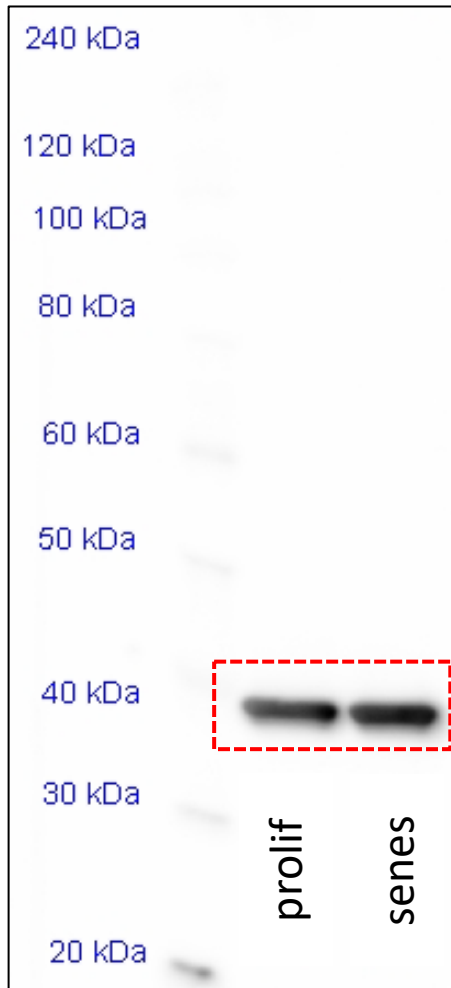

## CD22

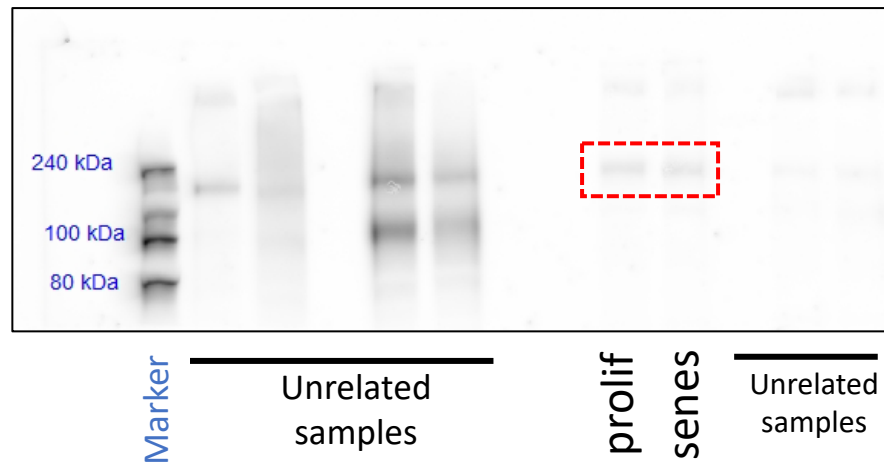

\* Membrane cut at ~75kDa; lower part incubated with unrelated antibody

## CD24

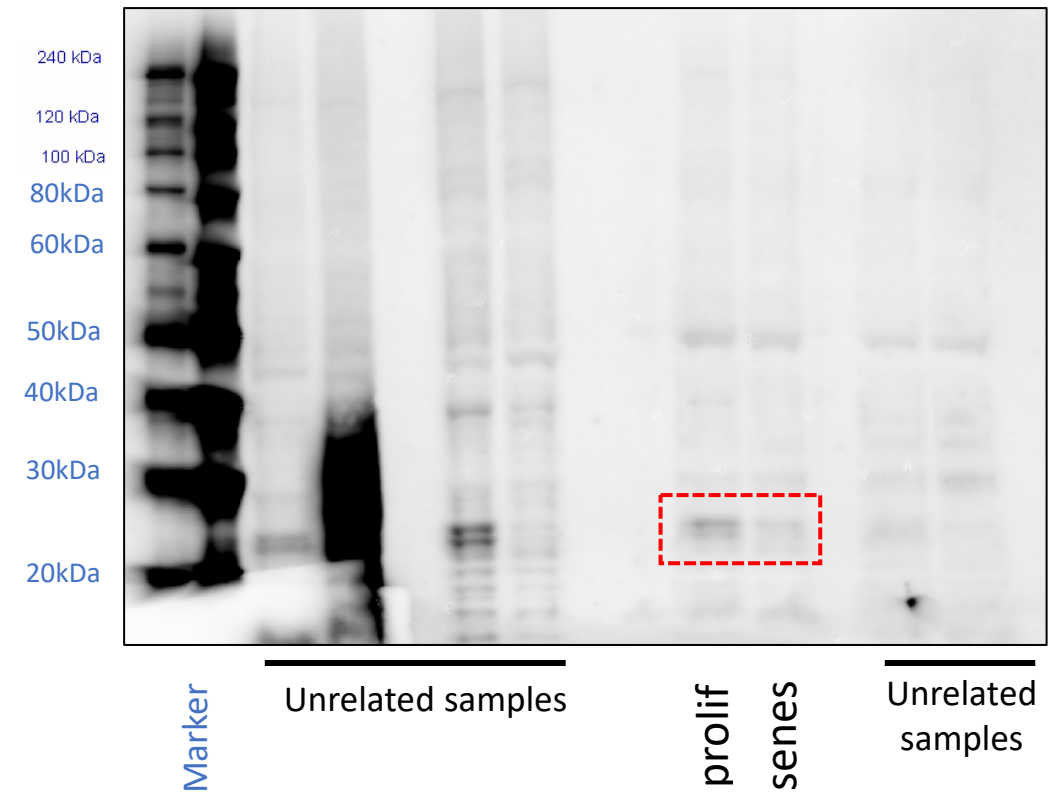

# Source Data F7E

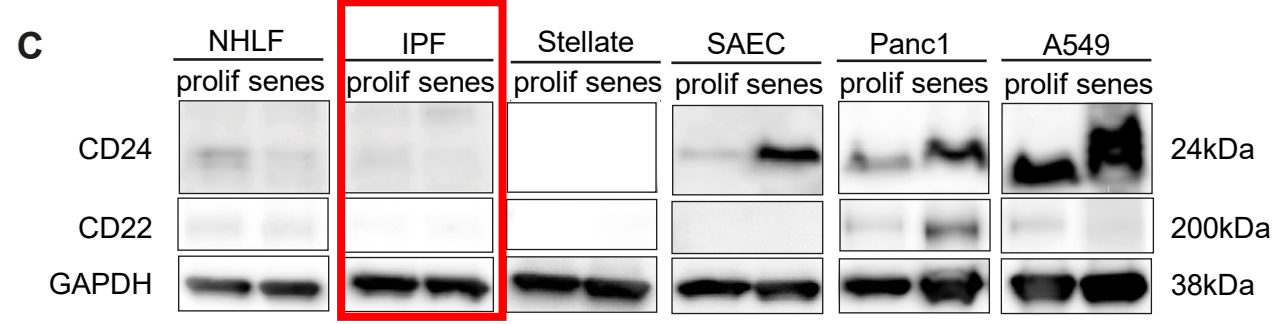

## GAPDH

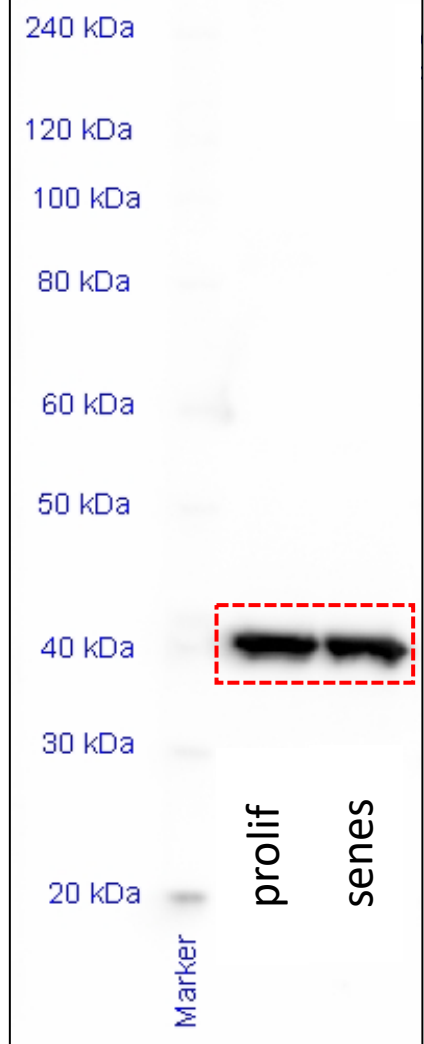

## CD22

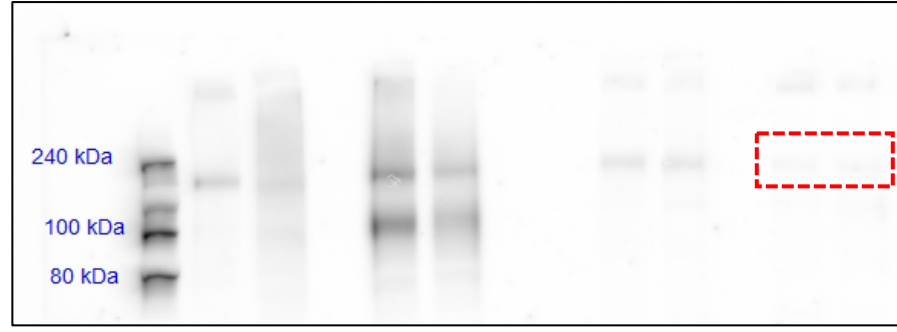

\* Membrane cut at ~75kDa; lower part incubated with unrelated antibody

## CD24

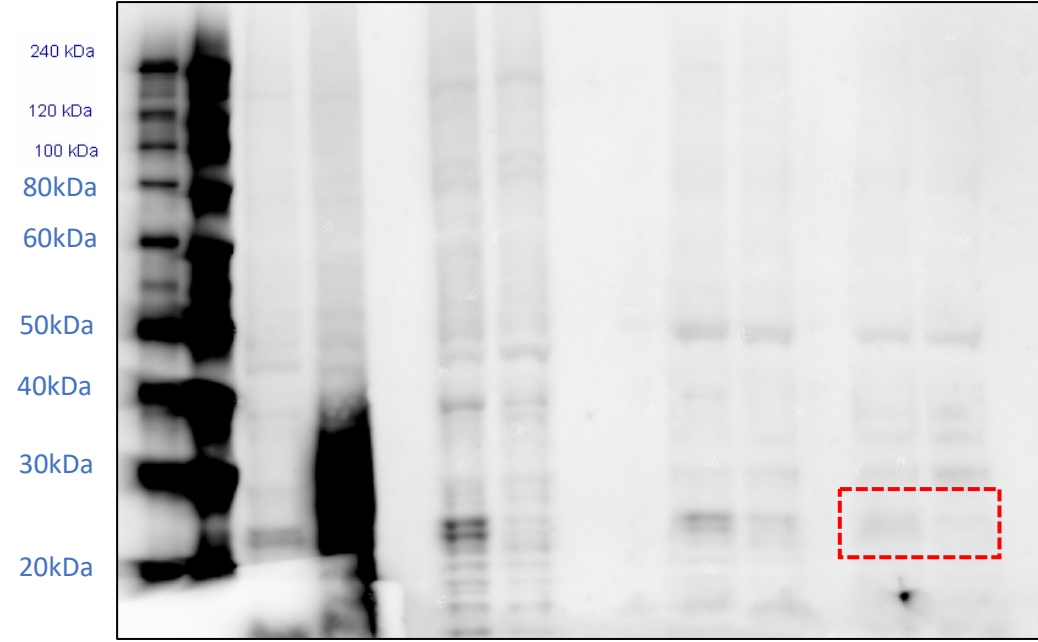

# Source Data F7E

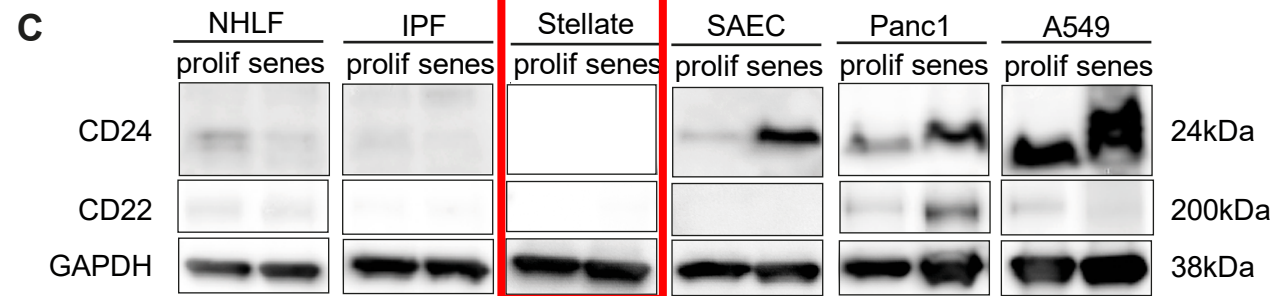

GAPDH

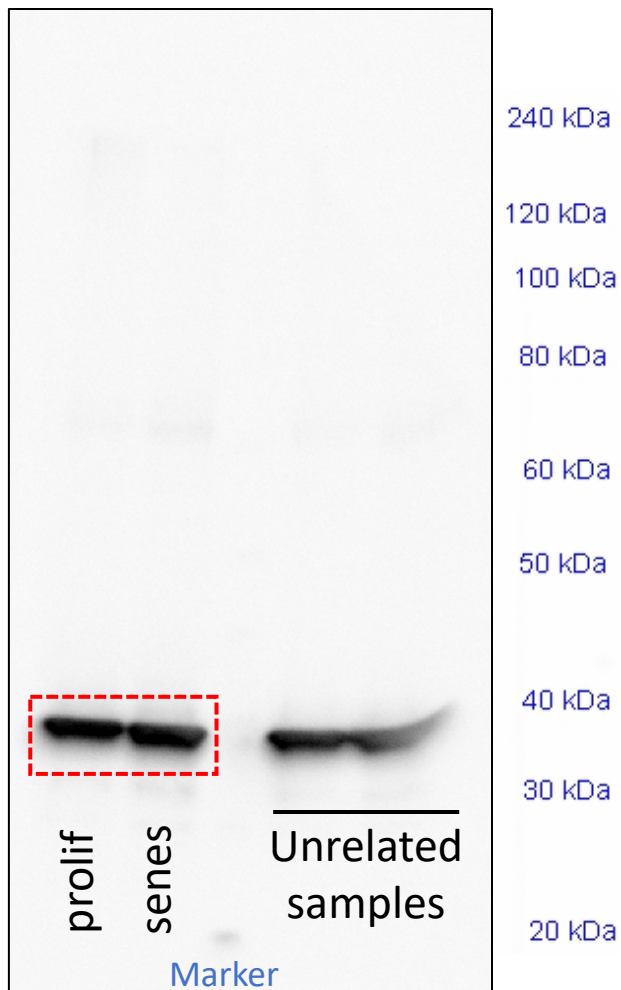

CD22

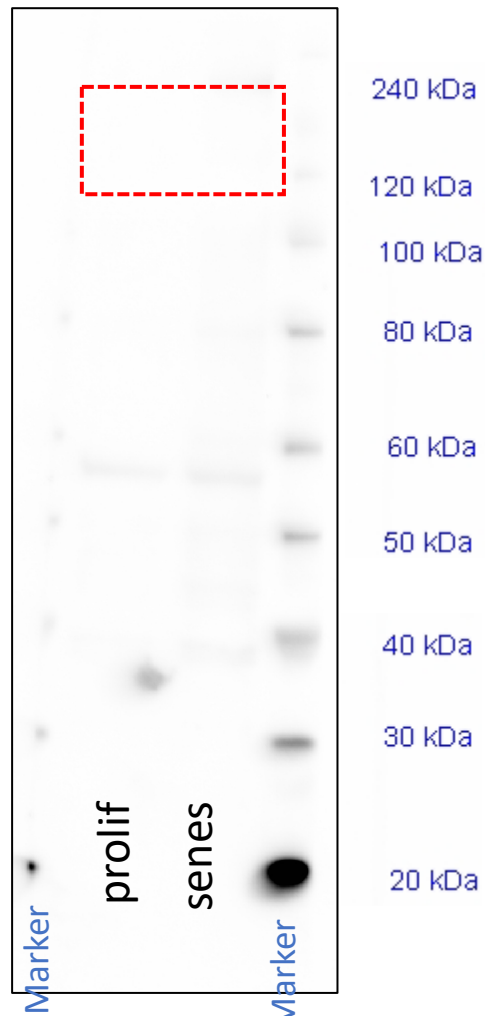

CD24

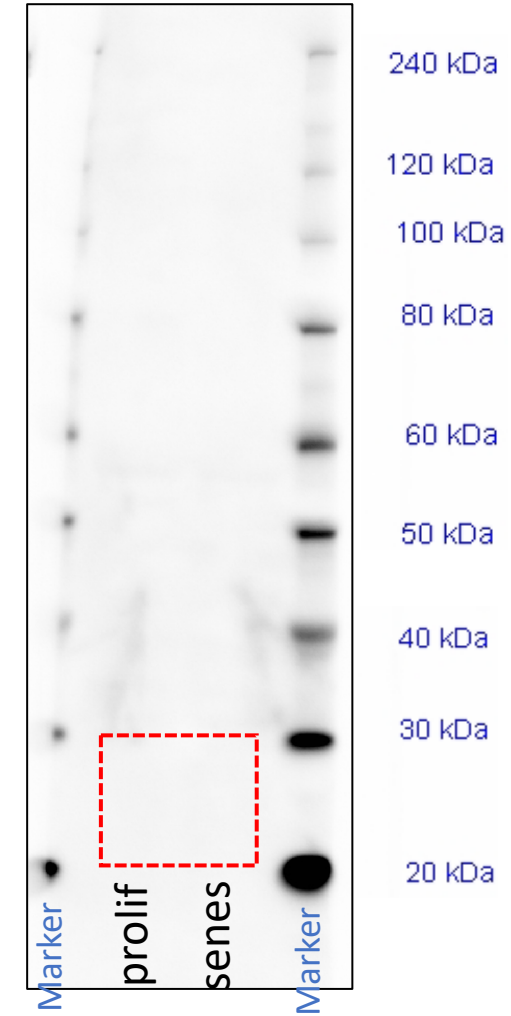

# Source Data F7E

C

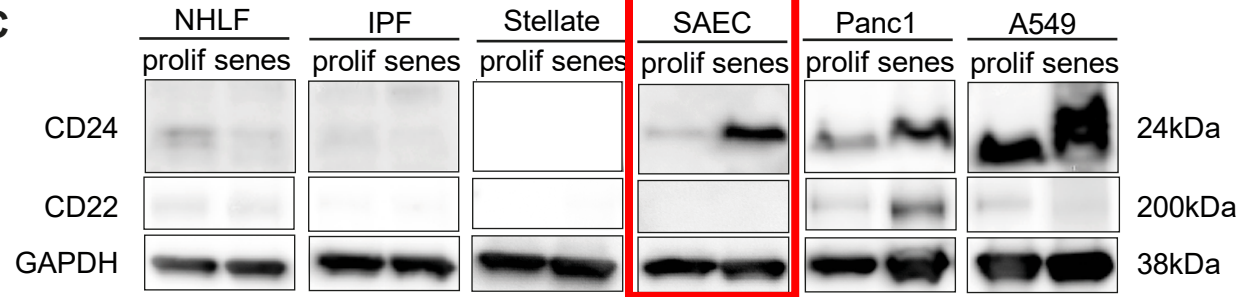

GAPDH

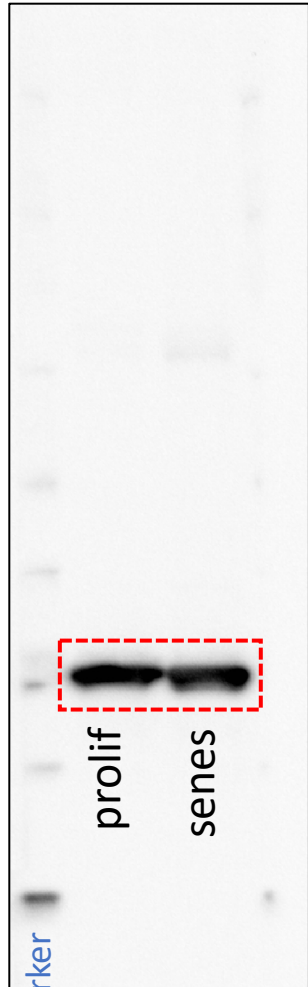

CD22

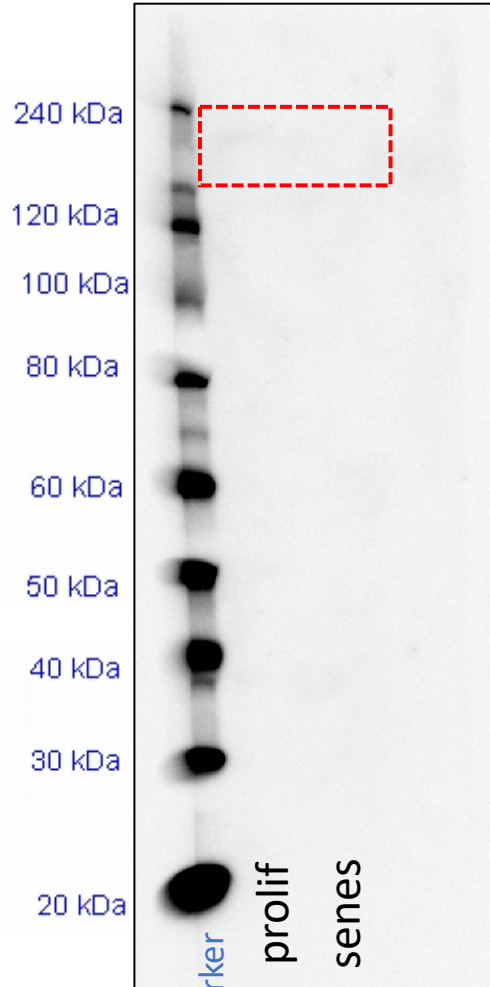

CD24

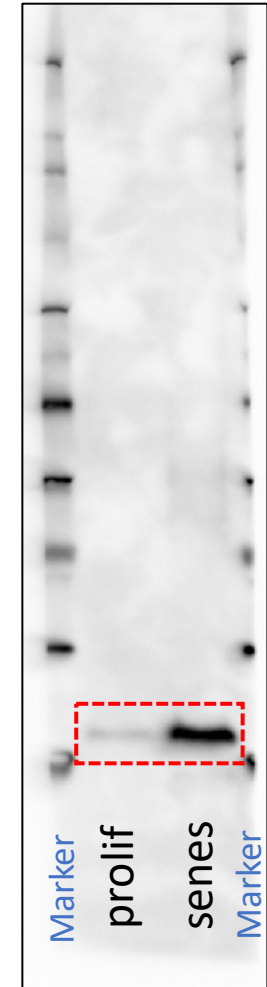

# Source Data F7E

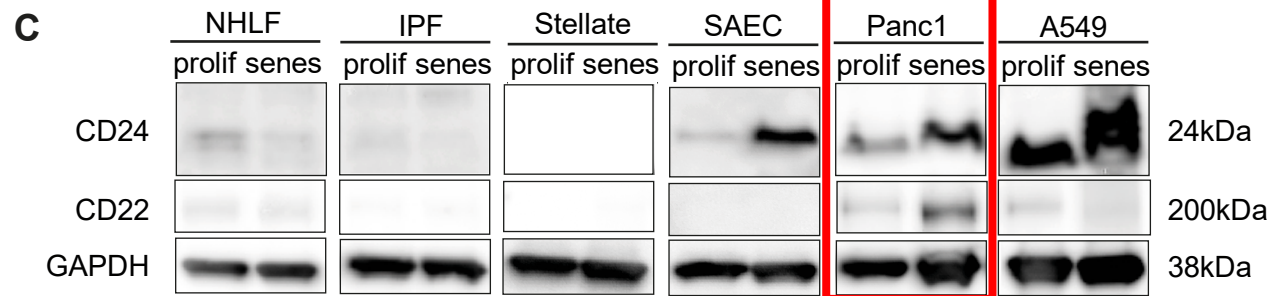

GAPDH

CD22

CD24

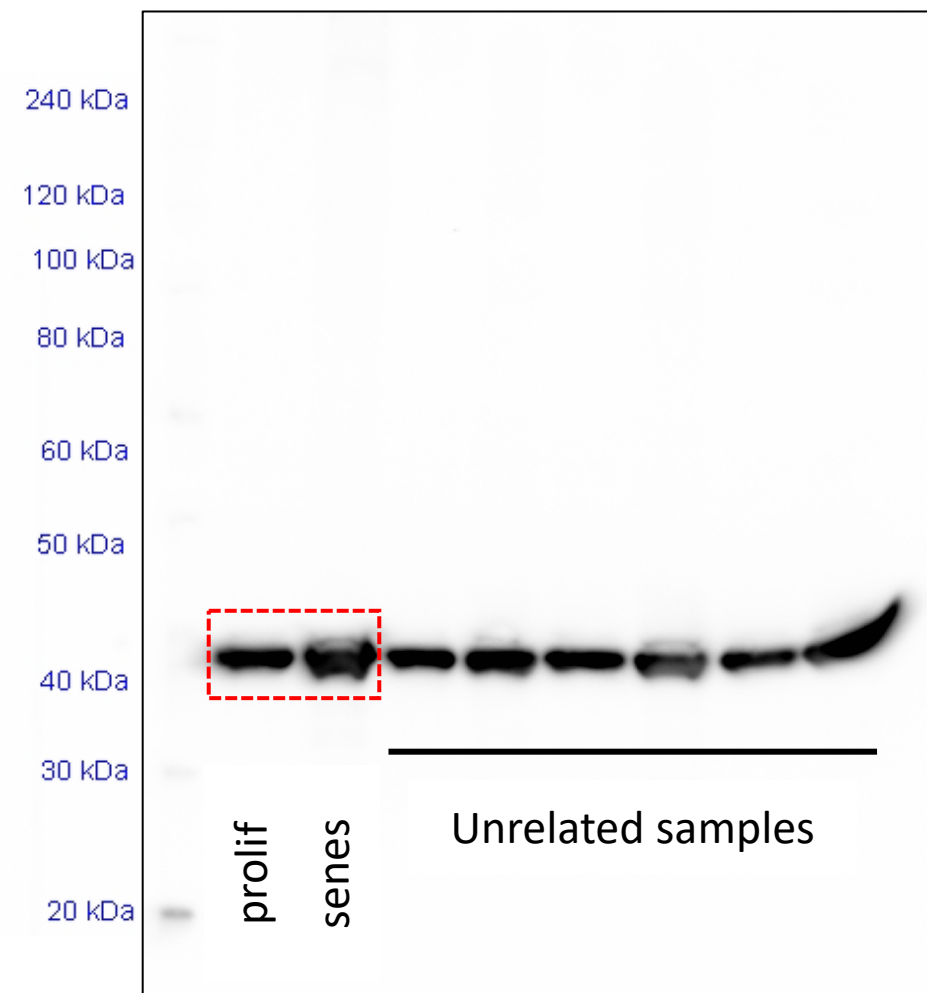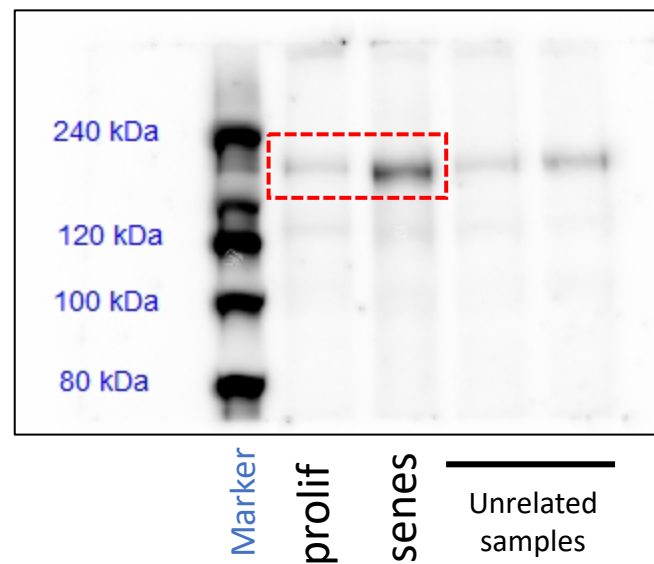

\* Membrane cut at ~75kDa; lower part incubated with unrelated antibody

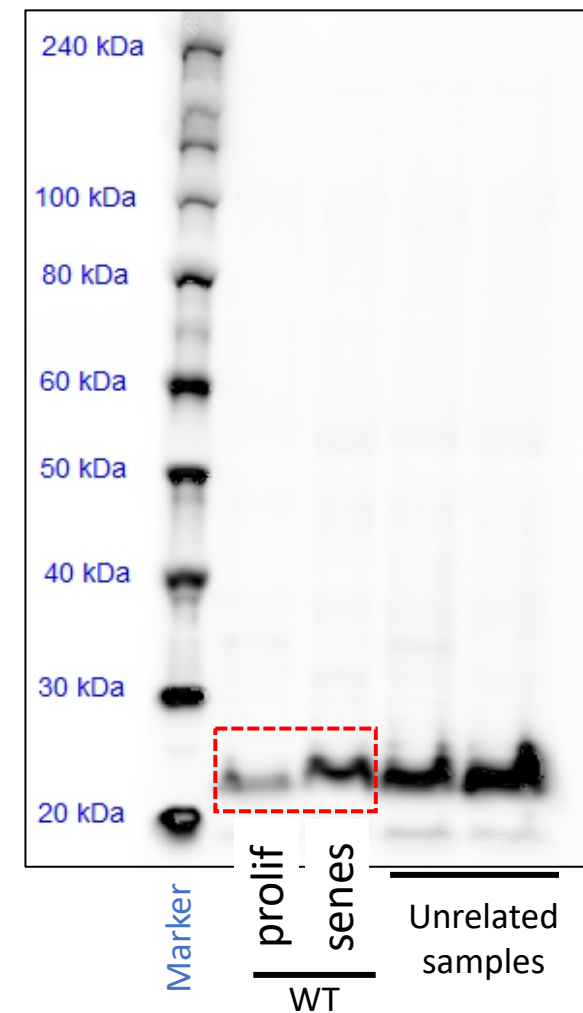

# Source Data F7E

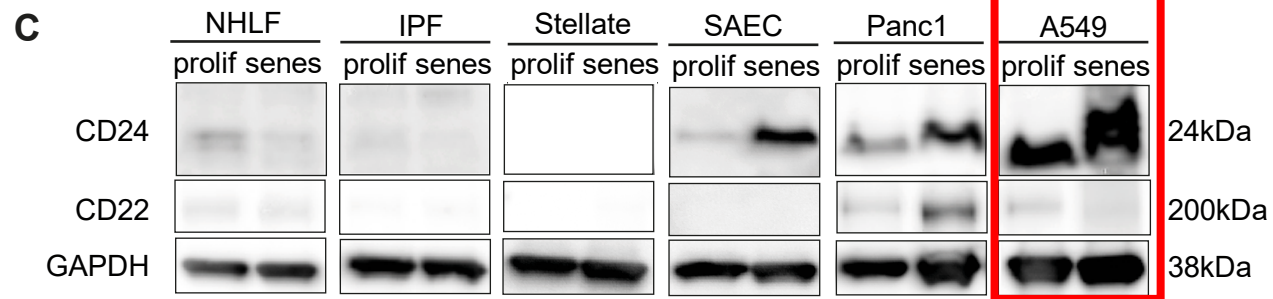

GAPDH

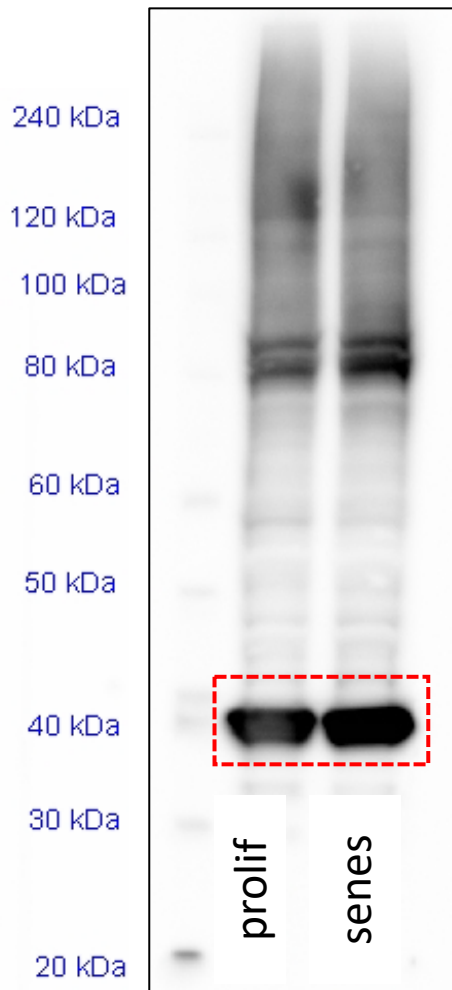

CD22

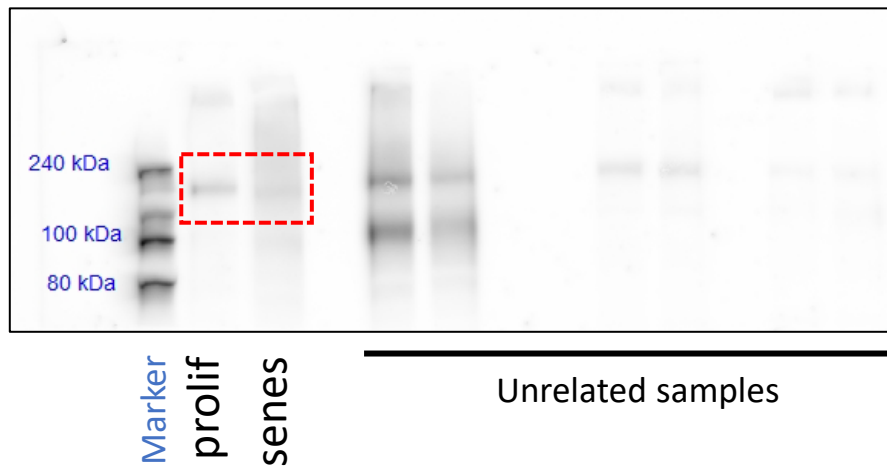

\* Membrane cut at ~75kDa; lower part incubated with unrelated antibody

CD24

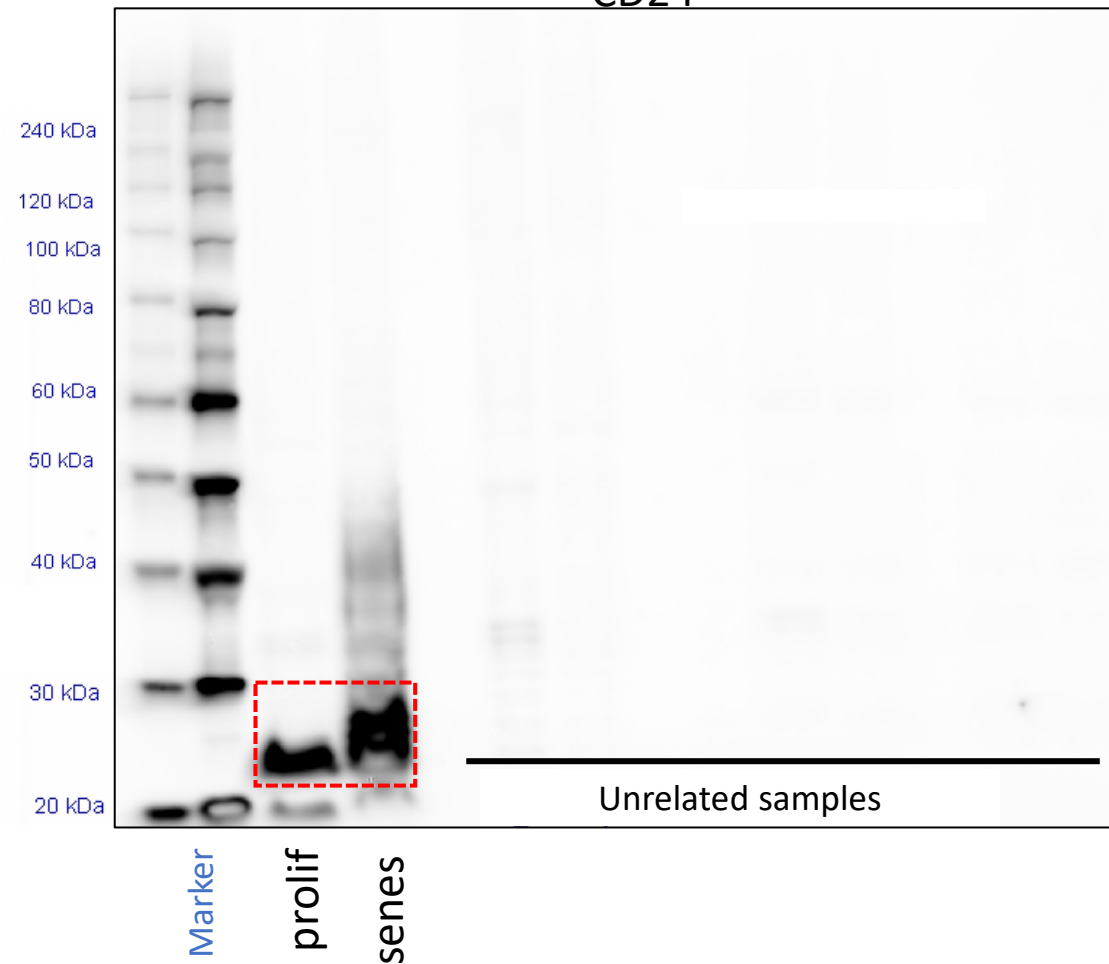

Supplement: JCB_202207097_SourceDataFS3.pdf [file JCB_202207097_SourceDataFS3.pdf]
