# Supplementary material for: Senescent cells suppress macrophage-mediated corpse removal via upregulation of the CD47-QPCT/L axis
Source: PubMed Central journal article supplement (PMC9723804; doi:10.1083/jcb.202207097), 2022-12-02

Source Data F8G

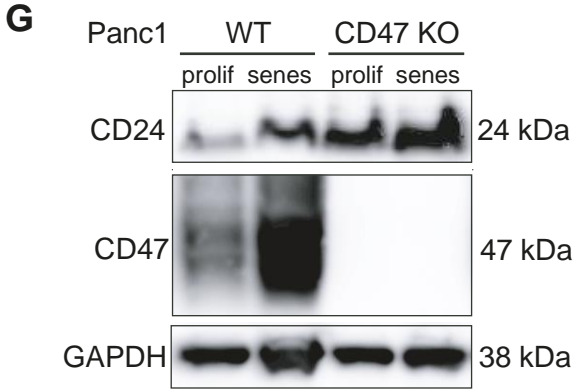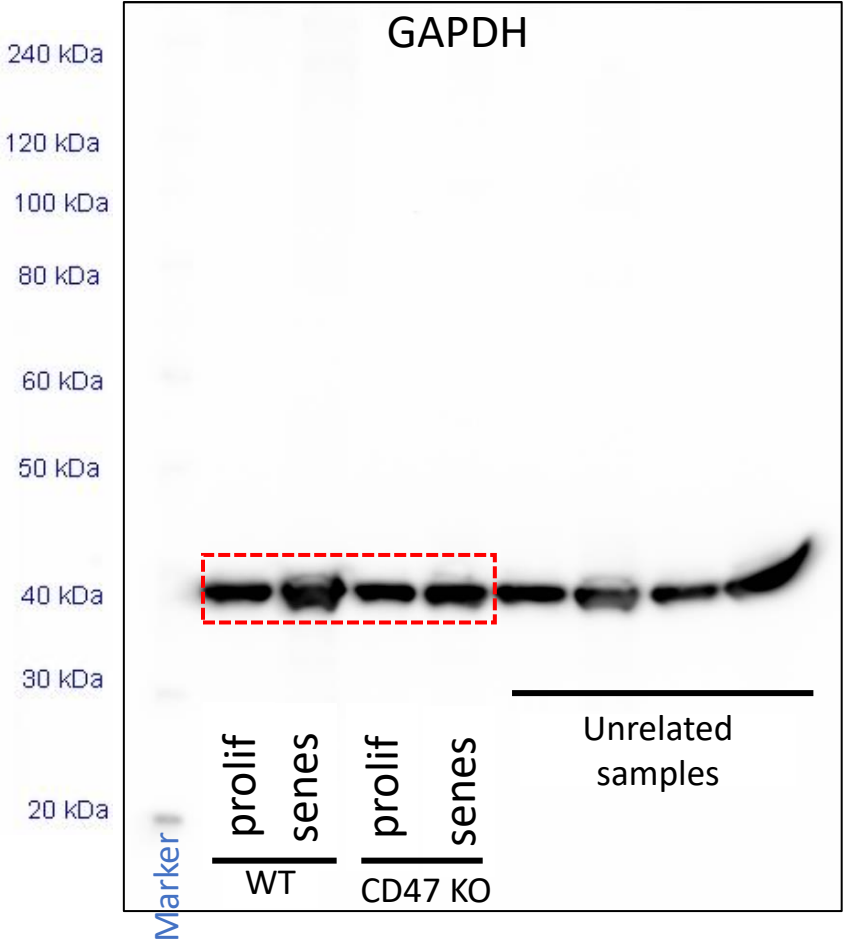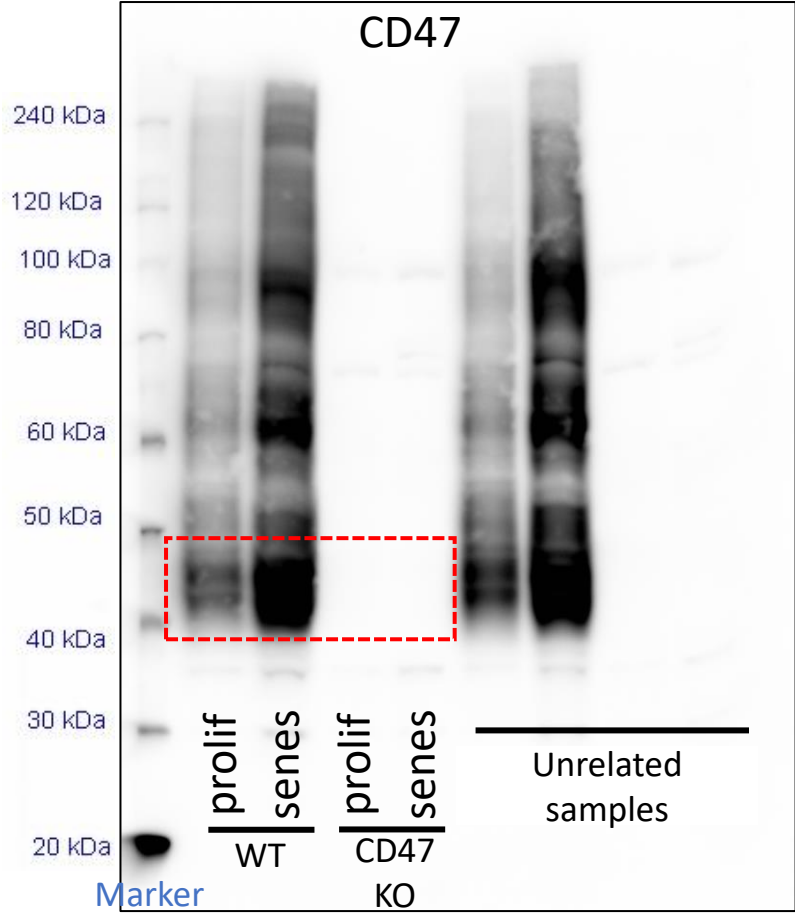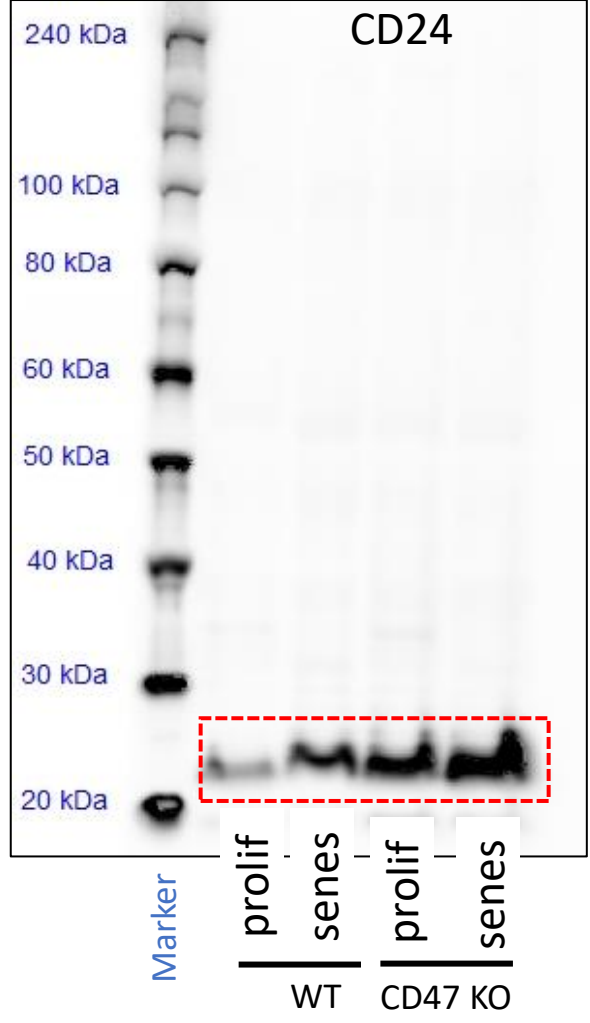

Supplement: JCB_202207097_SourceDataF8.pdf [file JCB_202207097_SourceDataF8.pdf]
